# Supplementary material for: γKlotho is a novel marker and cell survival factor in a subset of triple negative breast cancers
Source: PubMed Central journal article supplement (PMC4823059; doi:10.18632/oncotarget.6006), 2015-11-09
Supplement: oncotarget-07-2611-s001.pdf [file oncotarget-07-2611-s001.pdf]

## SUPPLEMENTARY FIGURES AND TABLES

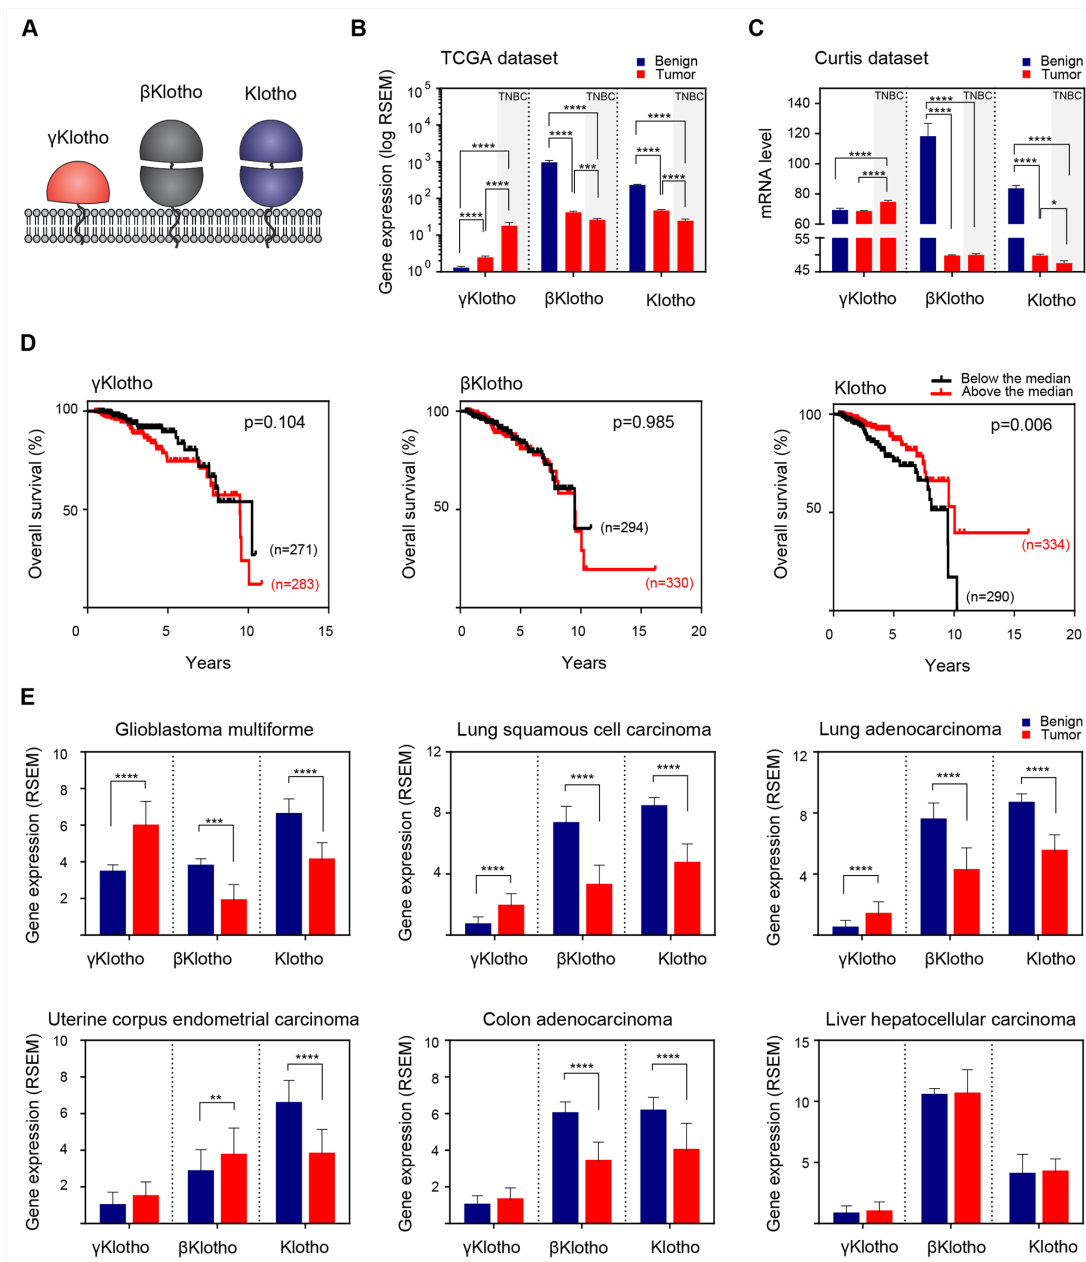

**Supplementary Figure S1: Klotho proteins in cancer patients.** **A.** Schematic representation of Klotho proteins. All three proteins are single-pass transmembrane proteins; unlike Klotho and  $\beta$ Klotho,  $\gamma$ Klotho contains only a single  $\beta$ -glycosidase-like domain in the extracellular region. **B.** The expression of Klotho genes in breast cancers and in corresponding benign tissues. Gene expression data (RNA-Seq) from TCGA were analyzed for difference in gene expression between triple negative ( $n = 120$ ) vs. non-triple negative ( $n = 610$ ) breast cancer samples and benign tissue ( $n = 111$ ) using one way ANOVA. **C.** The expression of Klotho genes was similarly analyzed as above in about 2,000 samples from the Curtis microarray dataset ( $n = 144$  benign, 320 TN, 1673 nonTN), by Bonferroni post-hoc test. **D.** Association of the expression of Klotho genes with breast cancer patients overall survival based on the median for each gene. Log-rank (Mantel-Cox) test was used to calculate significance. Clinical and gene expression data were obtained by from the TCGA portal. **E.** Differential expression (RNA-Seq) of Klotho genes across TCGA primary tumors: glioblastoma multiforme (154 primary tumor, 5 normal samples), lung squamous cell carcinoma (51 matched tumor/normal samples), lung adenocarcinoma (53 matched tumor/normal samples), uterine corpus endometrial carcinoma (144 primary tumor, 24 normal samples), colon adenocarcinoma (286 primary tumor, 41 normal samples) and liver hepatocellular carcinoma (50 matched tumor/ normal samples).  $**p \leq 0.01$ ,  $***p \leq 0.001$   $****p \leq 0.0001$ ; 2-way ANOVA.

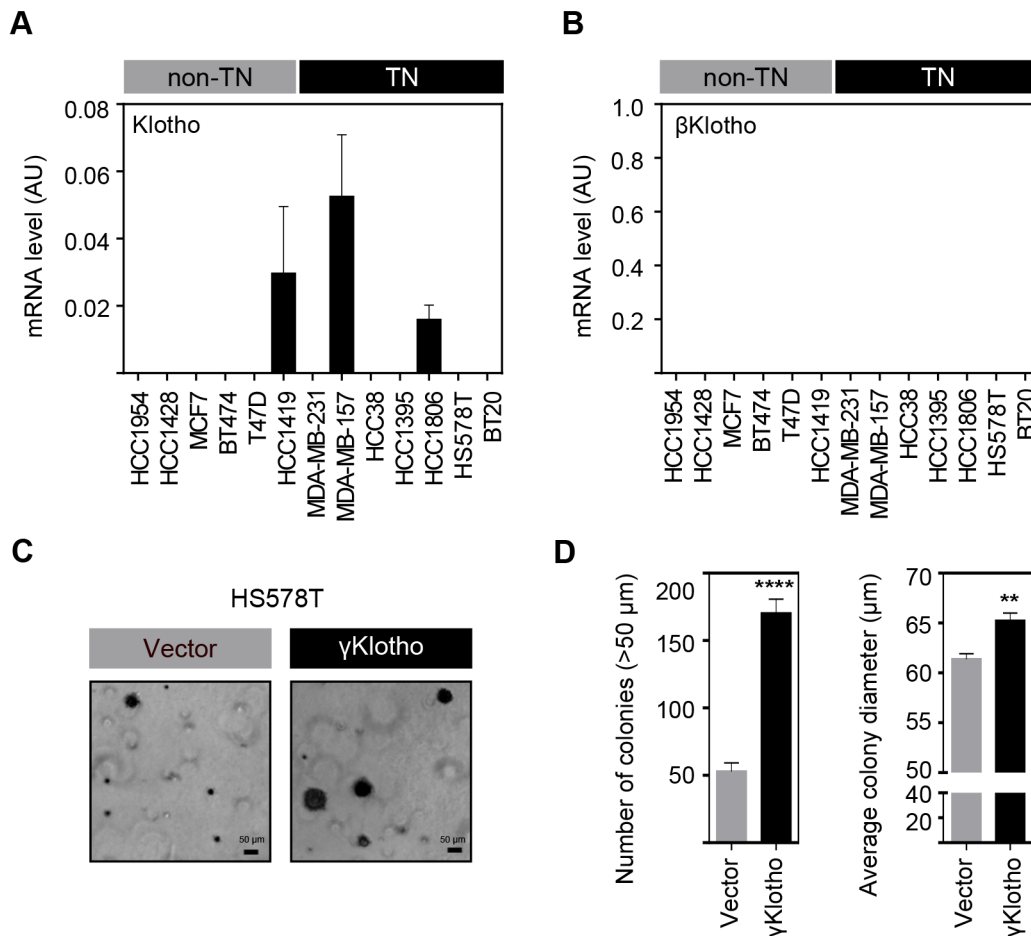

**Supplementary Figure S2:  $\gamma$ Klotho stimulates anchorage independent growth of breast cancer HS578T cells.** **A, B.** Klotho and  $\beta$ Klotho mRNA expression in breast cancer cell lines was determined by qRT-PCR and normalized against Rplp0. Each bar represents the mean  $\pm$  SD of two biological replicates. **C.** Images of representative soft-agar colonies in control vector or  $\gamma$ Klotho expressing HS578T cells. **D.** Bar graph showing number (left) and average diameter (right) of soft-agar colonies in vector or  $\gamma$ Klotho expressing HS578T cells that are larger than 50  $\mu\text{m}$  in diameter. Bars demonstrate average  $\pm$  SD across three independent experiments.  $**p \leq 0.01$ ,  $****p \leq 0.0001$ ; unpaired  $t$  test.

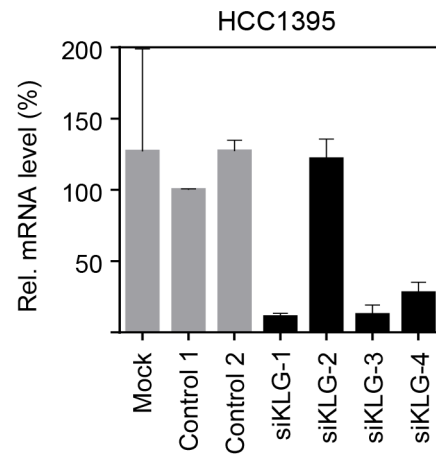

**Supplementary Figure S3: The efficiency of  $\gamma$ Klotho knockdown by siRNA transfection.** HCC1395 cells were transfected with two control siRNAs or four siRNAs targeting  $\gamma$ Klotho. Mock transfection was included as additional control.  $\gamma$ Klotho mRNA levels were determined by qRT-PCR two days after transfection. Gene expression was normalized against Rplp0, presented values are relative to the expression in Control 1. Each bar is the mean of two biological replicates  $\pm$  SD.

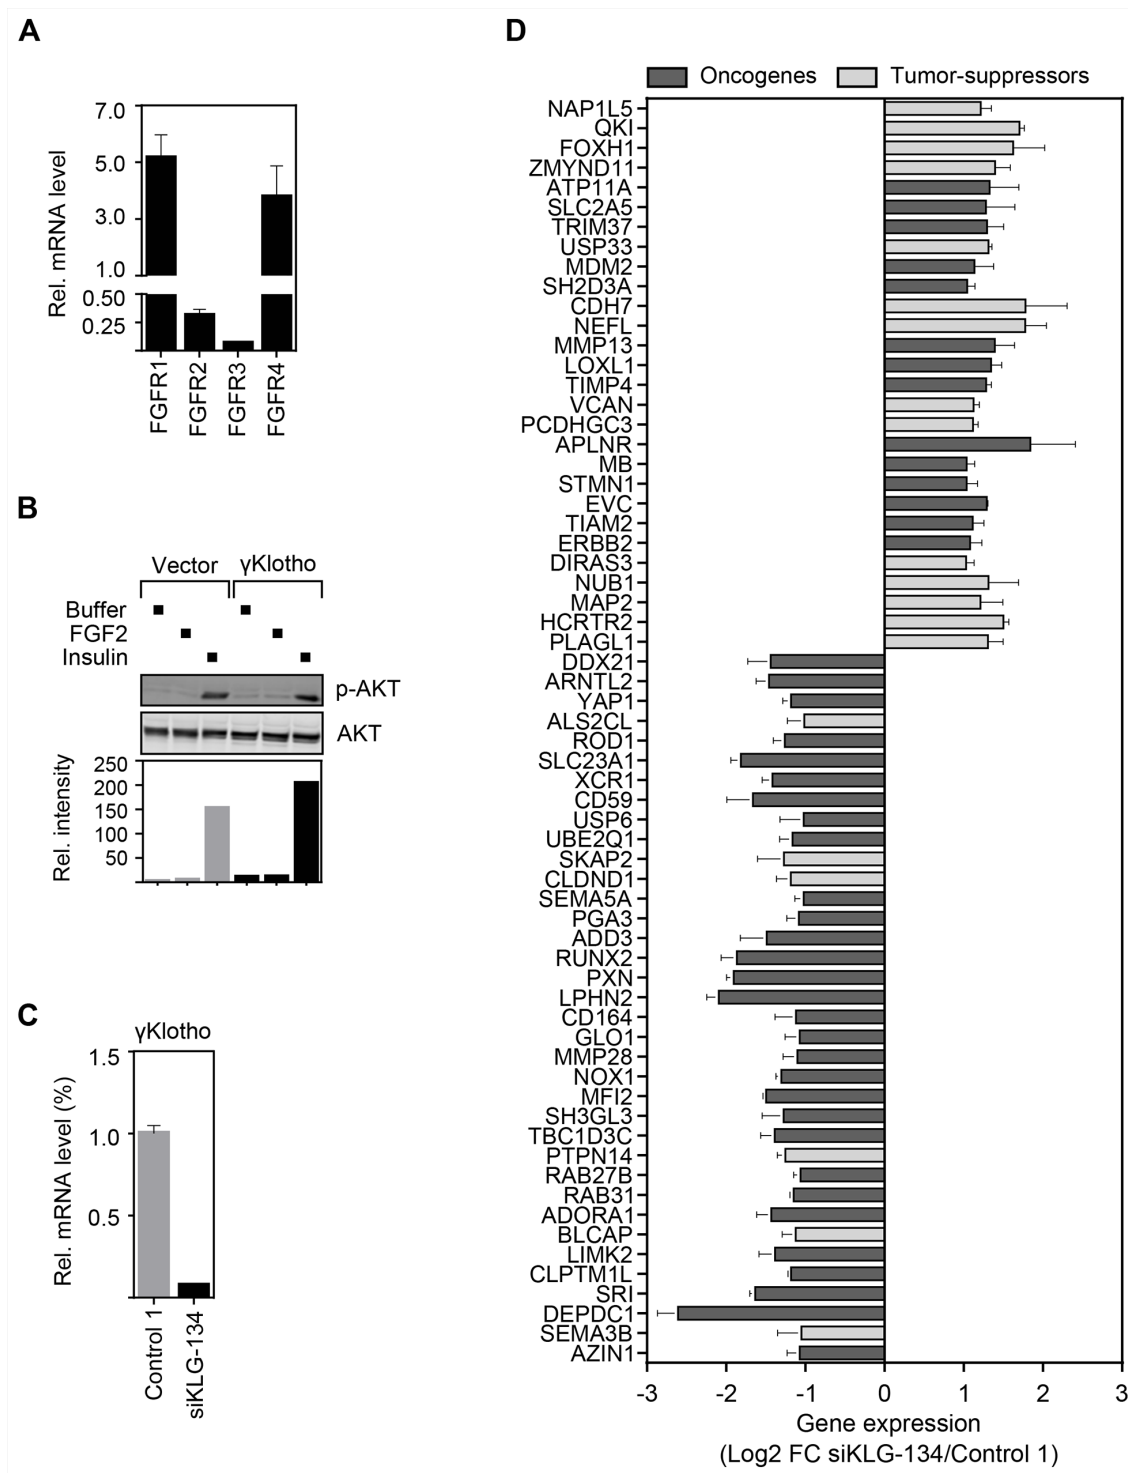

**Supplementary Figure S4: Oncogenes and tumor suppressors differentially expressed after  $\gamma$ Klotho knockdown.** **A.** mRNA expression was determined by qRT-PCR and normalized against Rplp0. Each bar represents the mean  $\pm$  SD of two biological replicates. **B.** AKT phosphorylation upon FGF2 or insulin treatment in control vector or  $\gamma$ Klotho stably expressing MDA-MB-231 cells, measured by western blot. **C.** HCC1395 cells were transfected with control siRNA (Control 1) or a pool of siRNAs targeting  $\gamma$ Klotho and 48 h later RNA was extracted for microarray expression analysis. Knock-down of  $\gamma$ Klotho was confirmed by qRT-PCR. mRNA expression was normalized against Rplp0 and is presented relative to Control 1. Each bar represents the mean  $\pm$  SD of two biological replicates. **D.** Levels of 64 differentially expressed genes after  $\gamma$ Klotho ablation which were previously shown to be involved in cancer pathogenesis as oncogenes or tumor suppressor genes, as indicated. Bars represent the mean  $\pm$  SD of two biological replicates.

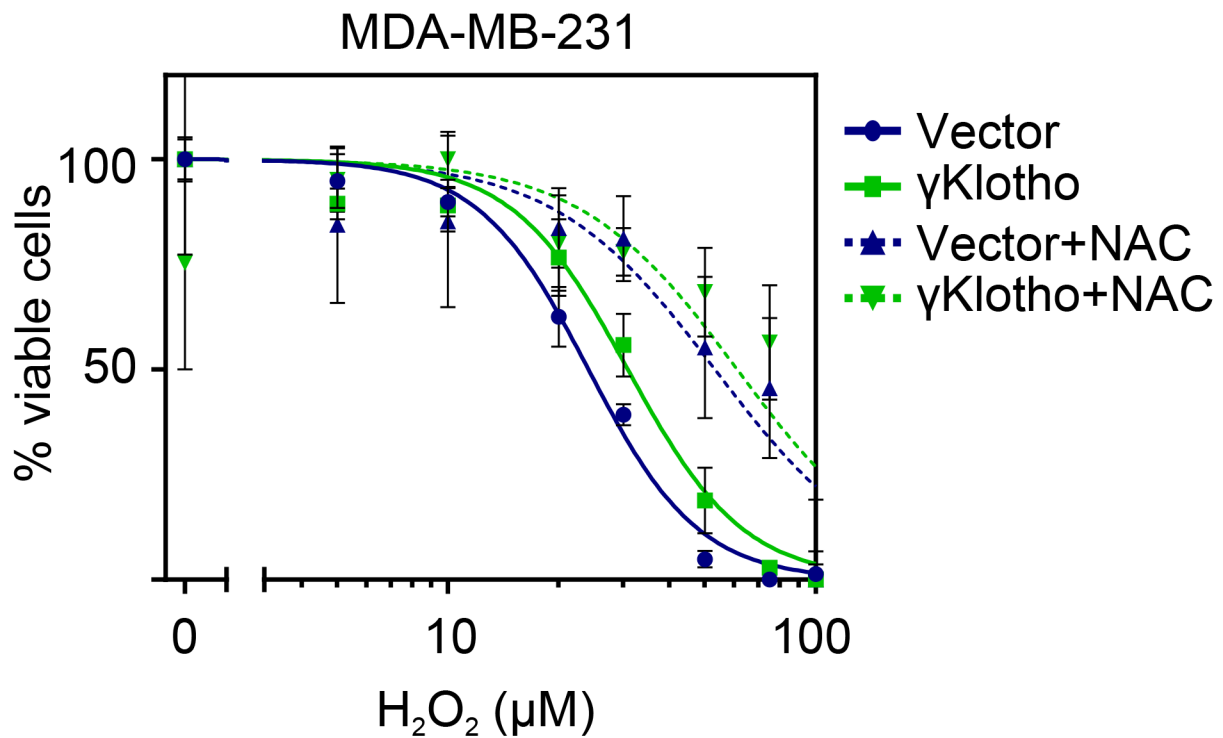

**Supplementary Figure S5:  $\gamma$ Klotho protects cancer cells against ROS toxicity.** MDA-MB-231 cells stably expressing vector control or  $\gamma$ Klotho-Flag were seeded in 96-well plates at 8000 cells/ well. 12 hours later, culture media was replaced with increasing concentrations of H<sub>2</sub>O<sub>2</sub> in serum free RPMI media with or without 1 h 1 mM NAC pretreatment. 72 hours later MTS viability assay was performed. Data are normalized to the untreated controls (100% viability). Dose response curves are plotted using a non-linear regression model and IC<sub>50</sub>s were determined from the fitted curves using Hill equation.

**Supplementary Table S1: Patient and tumor characteristics ER, Estrogen receptor; PR, progesterone receptor; HER2, human epidermal growth factor receptor 2**

| Parameter         | *             | Number | %    |
|-------------------|---------------|--------|------|
| <b>Age</b>        | <i>n</i> = 68 |        |      |
| < 55              |               | 32     | 47.1 |
| ≥ 55              |               | 36     | 52.9 |
| <b>Race</b>       | <i>n</i> = 62 |        |      |
| Caucasian         |               | 50     | 80.6 |
| Black             |               | 12     | 19.4 |
| <b>Tumor type</b> | <i>n</i> = 64 |        |      |
| Ductal            |               | 60     | 93.5 |
| Lobular           |               | 4      | 6.5  |
| <b>Grade</b>      | <i>n</i> = 65 |        |      |
| I                 |               | 7      | 10.8 |
| II                |               | 26     | 40.0 |
| III               |               | 32     | 49.2 |
| <b>Stage</b>      | <i>n</i> = 68 |        |      |
| I                 |               | 13     | 19.1 |
| II                |               | 37     | 54.4 |
| III               |               | 15     | 22.1 |
| IV                |               | 3      | 4.4  |
| <b>ER</b>         | <i>n</i> = 68 |        |      |
| Positive          |               | 43     | 63.2 |
| Negative          |               | 25     | 36.8 |
| <b>PR</b>         | <i>n</i> = 68 |        |      |
| Positive          |               | 36     | 52.9 |
| Negative          |               | 32     | 47.1 |
| <b>HER2</b>       | <i>n</i> = 67 |        |      |
| Positive          |               | 11     | 16.4 |
| Negative          |               | 56     | 83.6 |
| <b>Ki6</b>        | <i>n</i> = 67 |        |      |
| ≤ 14%             |               | 19     | 28.4 |
| > 14%             |               | 48     | 71.6 |
| <b>p53</b>        | <i>n</i> = 67 |        |      |
| ≤ 10%             |               | 45     | 67.2 |
| > 10%             |               | 22     | 32.8 |

\*total number with known parameters

**Supplementary Table S2: High levels of  $\gamma$ Klotho correlate with high grade/stage tumors**

| Dataset | Grade/Stage | N   | Mean expression | Stdev | p-value |
|---------|-------------|-----|-----------------|-------|---------|
| UTSW    | GI/II       | 33  | 0.00972         | 0.015 | 0.046*  |
|         | GIII        | 32  | 0.04066         | 0.083 |         |
| Curtis  | GI          | 170 | 68.2            | 10.8  | 0.005** |
|         | GII         | 775 | 68.6            | 11.8  |         |
|         | GIII        | 957 | 70.9            | 13.7  |         |
|         | S0          | 492 | 68.1            | 11.4  | 0.003** |
|         | SI          | 372 | 71.7            | 12.9  |         |
|         | SII         | 579 | 69.9            | 12.6  |         |
|         | SIII        | 90  | 72.6            | 14.0  |         |
|         | SIV         | 10  | 75.0            | 8.7   |         |

\*two tailed *t*-test, unpaired, unequal variance

\*\*Spearman *p*-value, *r* = 0.08 for grade; *r* = 0.076 for stage

**Supplementary Table S3:  $\gamma$ Klotho is preferentially upregulated in TN samples\***

| Curtis |               | <i>n</i>    | Percent    | TCGA |               | <i>n</i>   | Percent    |
|--------|---------------|-------------|------------|------|---------------|------------|------------|
|        | <b>nonTN</b>  | <b>1672</b> | <b>84%</b> |      | <b>nonTN</b>  | <b>548</b> | <b>74%</b> |
|        | Downregulated | 232         | 14%        |      | Downregulated | 77         | 14%        |
|        | Intermediate  | 1242        | 74%        |      | Intermediate  | 450        | 82%        |
|        | Upregulated   | 198         | 12%        |      | Upregulated   | 21         | 4%         |
|        | <b>TN</b>     | <b>320</b>  | <b>16%</b> |      | <b>TN</b>     | <b>116</b> | <b>16%</b> |
|        | Downregulated | 35          | 11%        |      | Downregulated | 6          | 5%         |
|        | Intermediate  | 199         | 62%        |      | Intermediate  | 62         | 53%        |
|        | Upregulated   | 86          | 27%        |      | Upregulated   | 48         | 41%        |

\*tumor samples were grouped into three expression levels based on +/-1 SD of the average of the cohort
